# Supplementary material for: Temperature-controlled synthesis of two novel coordination polymers modeled by semi-rigid tetrapyridines
Source: Royal Society of Chemistry journal article supplement (doi:10.1039/c1ce05549f), 2011-01-01
Supplement: c1ce05549f.pdf [file c1ce05549f.pdf]

## Temperature-controlled synthesis of two novel coordination polymers modeled by semi-rigid tetrapyridines

Yu,<sup>a</sup> Bao Li,<sup>b,\*</sup>

<sup>a</sup>School of chemistry and environmental engineering, Jiangnan University, Wuhan, Hubei 430056, P.R. China

<sup>b</sup> Department of Chemistry and Chemical Engineering, Huazhong University of Science and Technology, Wuhan, Hubei 430074, P.R. China

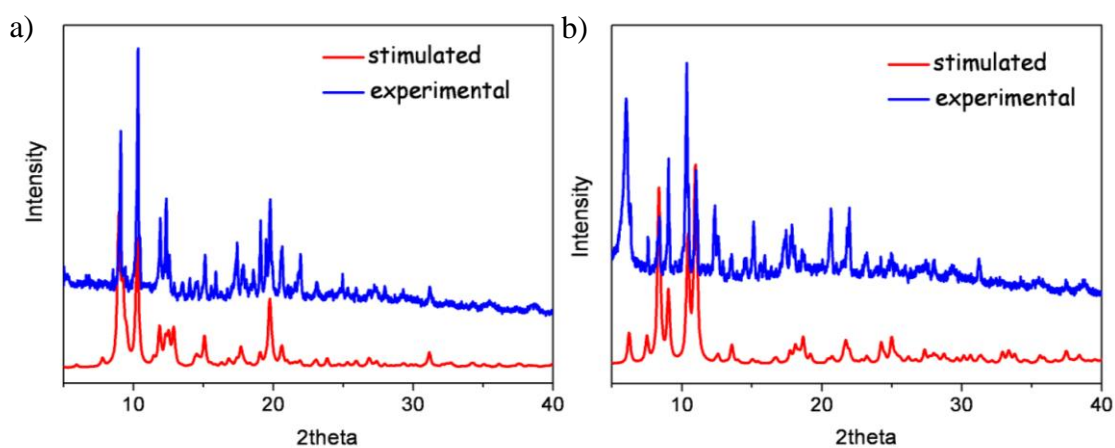

Figure S1. The XRD spectra of **1**(a) and **2**(b).
